# Supplementary material for: Co-design of a Community-based Financial Incentive Scheme for Smoking Cessation Services in Ireland: A Modified Nominal Group Technique
Source: Research Square preprint supplement (doi:10.21203/rs.3.rs-8688569/v1), 2026-01-29

**Additional file 1:** ACCORD Checklist

| Item No. | Section | Checklist Item (*help text*) | Page No. |
| --- | --- | --- | --- |
| T1 | **Title** | Identify the article as reporting a consensus exercise and state the consensus methods used in the title.  *For example, Delphi or nominal group technique.* | P.1 |
| I1 | **Introduction** | Explain why a consensus exercise was chosen over other approaches. | P.7 |
| I2 | State the aim of the consensus exercise, including its intended audience and geographical scope (national, regional, global). | P.7 |
| I3 | If the consensus exercise is an update of an existing document, state why an update is needed, and provide the citation for the original document. | NA |
| M1 | **Methods**  Registration | If the study or study protocol was prospectively registered, state the registration platform and provide a link. If the exercise was not registered, this should be stated.  *Recommended to include the date of registration.* | P.8 |
| M2 | Selection of SC and/or panellists | Describe the role(s) and areas of expertise or experience of those directing the consensus exercise.  *For example, whether the project was led by a chair, co-chairs or a steering committee, and, if so, how they were chosen. List their names if appropriate, and whether there were any subgroups for individual steps in the process.* | P.9 |
| M3 | Explain the criteria for panellist inclusion and the rationale for panellist numbers. State who was responsible for panellist selection. | P.9 |
| M4 | Describe the recruitment process (how panellists were invited to participate).  *Include communication/advertisement method(s) and locations, numbers of invitations sent, and whether there was centralised oversight of invitations or if panellists were asked/allowed to suggest other members of the panel.* | P.9 |
| M5 | Describe the role of any members of the public, patients or carers in the different steps of the study. | P.9-12 |
| M6 | Preparatory research | Describe how information was obtained prior to generating items or other materials used during the consensus exercise.  *This might include a literature review, interviews, surveys, or another process.* | P.7;9 |
| M7 | Describe any systematic literature search in detail, including the search strategy and dates of search or the citation if published already.  *Provide the details suggested by the reporting guideline PRISMA and the related PRISMA-Search extension.* | NA |
| M8 | Describe how any existing scientific evidence was summarised and if this evidence was provided to the panellists. | P. 9-11 |
| M9 | Assessing consensus | Describe the methods used and steps taken to gather panellist input and reach consensus (for example, Delphi, RAND-UCLA, nominal group technique).  *If modifications were made to the method in its original form, provide a detailed explanation of how the method was adjusted and why this was necessary for the purpose of your consensus-based study.* | P.9-11 |
| M10 | Describe how each question or statement was presented and the response options. State whether panellists were able to or required to explain their responses, and whether they could propose new items.  *Where possible, present the questionnaire or list of statements as supplementary material.* | P. 10-11 |
| M11 | State the objective of each consensus step.  *A step could be a consensus meeting, a discussion or interview session, or a Delphi round.* | P. 10-11 |
| M12 | State the definition of consensus (for example, number, percentage, or categorical rating, such as ‘agree’ or ‘strongly agree’) and explain the rationale for that definition. | P.11 |
| M13 | State whether items that met the prespecified definition of consensus were included in any subsequent voting rounds. | P.10-11 |
| M14 | For each step, describe how responses were collected, and whether responses were collected in a group setting or individually. | P.9-11 |
| M15 | Describe how responses were processed and/or synthesised.  *Include qualitative analyses of free-text responses (for example, thematic, content or cluster analysis) and/or quantitative analytical methods, if used.* | P.11-12 |
| M16 | Describe any piloting of the study materials and/or survey instruments.  *Include how many individuals piloted the study materials, the rationale for the selection of those individuals, any changes made as a result and whether their responses were used in the calculation of the final consensus. If no pilot was conducted, this should be stated.* | NA |
| M17 | If applicable, describe how feedback was provided to panellists at the end of each consensus step or meeting.  *State whether feedback was quantitative (for example, approval rates per topic/item) and/or qualitative (for example, comments, or lists of approved items), and whether it was anonymised.* | P.10-11 |
| M18 | State whether anonymity was planned in the study design. Explain where and to whom it was applied and what methods were used to guarantee anonymity. | NA |
| M19 | State if the steering committee was involved in the decisions made by the consensus panel.  *For example, whether the steering committee or those managing consensus also had voting rights.* | P.9;10 |
| M20 | Participation | Describe any incentives used to encourage responses or participation in the consensus process.  *For example, were invitations to participate reiterated, or were participants reimbursed for their time.* | P.9 |
| M21 | Describe any adaptations to make the surveys/meetings more accessible.  *For example, the languages in which the surveys/meetings were conducted and whether translations or plain language summaries were available*. | P9 -11 |
| R1 | Results | State when the consensus exercise was conducted. List the date of initiation and the time taken to complete each consensus step, analysis, and any extensions or delays in the analysis. | P.8-9;11-12 |
| R2 | Explain any deviations from the study protocol, and why these were necessary.  *For example, addition of panel members during the exercise, number of consensus steps, stopping criteria; report the step(s) in which this occurred.* | NA |
| R3 | For each step, report quantitative (number of panellists, response rate) and qualitative (relevant socio-demographics) data to describe the participating panellists. | P.9;12-14 |
| R4 | Report the final outcome of the consensus process as qualitative (for example, aggregated themes from comments) and/or quantitative (for example, summary statistics, score means, medians and/or ranges) data. | P.14-28 |
| R5 | List any items or topics that were modified or removed during the consensus process. Include why and when in the process they were modified or removed. | P.14; S.file 4 |
| D1 | Discussion | Discuss the methodological strengths and limitations of the consensus exercise.  *Include factors that may have impacted the decisions (for example, response rates, representativeness of the panel, potential for feedback during consensus to bias responses, potential impact of any non-anonymised interactions).* | P.31-32 |
| D2 | Discuss whether the recommendations are consistent with any pre-existing literature and, if not, propose reasons why this process may have arrived at alternative conclusions. | P.27-31 |
| O1 | Other information | List any endorsing organisations involved and their role. | P.33 |
| O2 | State any potential conflicts of interests, including among those directing the consensus study and panellists. Describe how conflicts of interest were managed. | P.33 |
| O3 | State any funding received and the role of the funder.  *Specify, for example, any funder involvement in the study concept/design, participation in the steering committee, conducting the consensus process, funding of any medical writing support. This could be disclosed in the methods or in the relevant transparency section of the manuscript. Where a funder did not play a role in the process or influence the decisions reached, this should be specified.* | P.32 |

From: PLoS Med 21(1): e1004326. <https://doi.org/10.1371/journal.pmed.1004326> For more information see: <https://www.ismpp.org/accord>

**Additional file 2:** Individual ranking sheet

**Ranking Sheet - COMPASS**

Please rank your top 5 answers to the above issues, assigning a score of 5 to the highest priority idea and a score of 1 to the lowest priority idea.

**Question 1: Amount/magnitude**

If the health service was to provide a financial incentive to someone to assist them quit smoking, how much in total (if anything) do you think that should

____________________________________________ (Score of 5) (Highest priority)

____________________________________________ (Score of 4)

____________________________________________ (Score of 3)

____________________________________________ (Score of 2)

____________________________________________ (Score of 1)

**Question 2: Form**

What form of financial incentive should be given (e.g. cash, vouchers, electronic money transfer, other)?

____________________________________________ (Score of 5) (Highest priority)

____________________________________________ (Score of 4)

____________________________________________ (Score of 3)

____________________________________________ (Score of 2)

____________________________________________ (Score of 1)

**Question 3: Certainty**

If a financial incentive was given, should this follow a definite schedule (e.g., you always get a reward for quitting), or a variable one (e.g. you might be entered into a prize draw when you quit in which the chances of winning are probably small)?

____________________________________________ (Score of 5) (Highest priority)

____________________________________________ (Score of 4)

____________________________________________ (Score of 3)

____________________________________________ (Score of 2)

____________________________________________ (Score of 1)

**Question 4: Target behaviour**

What smoking cessation behaviours should be incentivised? E.g., only quitting at a certain timepoint, or attendance at smoking cessation services, or something else?

____________________________________________ (Score of 5) (Highest priority)

____________________________________________ (Score of 4)

____________________________________________ (Score of 3)

____________________________________________ (Score of 2)

____________________________________________ (Score of 1)

**Question 5: Frequency and schedule**

How often should smoking cessation behaviours be incentivised?

E.g., should every interaction with smoking cessation services be incentivised, or only quitting at a certain timepoint? Should incentives increase or decrease over time, or should they remain constant?

____________________________________________ (Score of 5) (Highest priority)

____________________________________________ (Score of 4)

____________________________________________ (Score of 3)

____________________________________________ (Score of 2)

____________________________________________ (Score of 1)

**Question 6: Immediacy**

How quickly after the target smoking cessation behaviour is achieved should the person receive the incentive?

____________________________________________ (Score of 5) (Highest priority)

____________________________________________ (Score of 4)

____________________________________________ (Score of 3)

____________________________________________ (Score of 2)

____________________________________________ (Score of 1)

**Question 7: Who?**

Who should be targeted for financial incentives for smoking cessation?

____________________________________________ (Score of 5) (Highest priority)

____________________________________________ (Score of 4)

____________________________________________ (Score of 3)

____________________________________________ (Score of 2)

____________________________________________ (Score of 1)

**Question 8: Provider**

Who should provide the information about financial incentives for smoking cessation? Who or what body/profession should provide or organise the actual incentive?

____________________________________________ (Score of 5) (Highest priority)

____________________________________________ (Score of 4)

____________________________________________ (Score of 3)

____________________________________________ (Score of 2)

____________________________________________ (Score of 1)

**Additional file 3:** Theoretical assumptions, paradigm, researcher reflectivity and data triangulation process

Braun and Clarke (2012, 2014, 2020) have outlined a number of theoretical assumptions that should be addressed upon conducting reflective thematic analysis (RTA). These assumptions include the epistemological and ontological stances to data (David Byrne, 2021, Braun and Clarke, 2022). The research question for the qualitative component of this study was addressed within a paradigmatic framework of critical realism and contextualism in accordance with the qualitative philosophy of RTA. Since RTA provides access to their underlying assumptions where emphasis is placed on meaning co-production by respecting the context of the study and participant’s individual accounts while acknowledging potential influences of my interpretations of either as a researcher, it stood out as the most suitable method for my analytical approach (Braun and Clarke, 2022).

Due to the nature of the study, however, as qualitative data were collected in the form of the discussions accompanying the NGT, these considerations became more salient as I set the qualitative component question, examined the dataset and was further consolidated during analysis.

**Underpinning paradigms & impact on analytical processes**

In line with previous work, meaningfulness was developed, firstly on my part as a researcher, to identify units and themes that align with the research question, and secondly on the part of the participants, as reflections of varying importance relevant to the FI domains and hence the question being addressed (David Byrne, 2021). Governing such were the following series of assumptions.

**Epistemology**

The epistemological stance *(how do we know what exists/reality*) adopted to this data was contextualism. As such, context and perspective-contingent nature of meaning and knowledge making while retaining a concern for truth was emphasised (Alvesson & Skoldberg, 2009; Braun and Clarke, 2022; Madill, et al. 2000). With this approach, multiple accounts of reality are accepted yet one version doesn’t necessarily invalidate the other while some may be more valuable/convincible than others; hence knowledge is evaluated with regards *to its utility rather than accuracy* (Madill et al., 2000).

I found this view befitting of my inquiry to know and interpret what our participants -either individually or as a group, valued, prioritised or worried about when it came to certain aspects of FI design within context and with the possibility of its implementation at the smoking cessation services- which they are familiar with of as users, providers, managers or community members... Etc. This hence allowed the unpacking of *situated meanings* (which are not necessarily universal, or context-free)where I prioritised theme development based on participants’ views that are embedded in the Irish context as the central criterion in the coding process.

**Ontology**

Contextualism maps broadly to the ontology of critical realism (what exits/that nature of reality); as similar to contextualism, it occupies a position somewhere between “realism” and “relativism” (Braun and Clarke, 2022). This stance accepts that reality is often “mediated” through participants’ reflections and that although there is an independent truth from human structures (Madill et al., 2000) this truth is often veiled by both subjectivity and processes of knowledge production (Braine and Clarke, 2006; Braun and Clarke, 2022). It is therefore possible to examine the constitution of a contextual reality, specifically the influence of the broader context/reality e.g., existing laws and policies in Ireland, on systems of meaning e.g., attitude towards the number of incentives given (David Byrne, 2021; Braun and Clarke 2022). This greatly aligned with my interest to render visible to the reader some of the contexts of the research that shaped the knowledge produced (Madill et al., 2000; Tebes, 2055; Braun and Clarke, 2022).

Complementing my approach to meaning production, I since accessed the data minded with the research question to identify how the Irish context, specifically the smoking cessation services, existing administrative systems, smoking impact and disadvantaged communities, supports (or not) / interacted with (or not) with our participant’s idea-making and version of reality.

**Data Triangulation:**

Triangulation naturally occurred during analysis and was articulated in the manuscript write‑up. Quantitative rankings were first explained with participants’ qualitative justifications to interpret the prioritised ideas, and this integrated understanding was then reflected in the results narrative.

**Reflexivity:**

Although, reflectivity was not practiced formally, I was aware of how my role as a researcher influenced my analytic process in light of the adopted paradigms.

From the outset, formulating the research question was based on my interest to showcase the complexity of the decision-making process associated with the NGT, where each participant presented their ideas, attitudes and perspectives towards various aspects of the FI scheme design. Each of which could be valid on its own, yet in such setting, consensus (hence, utility of ideas was inherently evaluated as context was viewed as inseparable part of the process) was necessary to consider as to allow FI development and implementation. Given my background as a doctorate candidate in Ireland, with a background in medicine - and personal characterises; Egyptian non-smoker woman that I believe allowed me approach the dataset with no preconceived notions ready to engage with all accounts of expressions, I since predominately engaged with the data through a professional (i.e., medical / public health) lens. That explains, that initially in the process, I was naturally gravitating towards explicit or strong statements that shone the light on the impact - often determinantal- of certain elements certain design elements could have on any of the stakeholder groups or the community or vice versa e.g., validation of behaviour, different methods and their limitations for patient groups (COPD). Yet upon in-depth examination of the dataset and throughout the analytical process and with constant reflection on my overall research aim, I was able to centre all relevant and diverse views of participants and/or their experiences to the different components of the FI design while also highlighting some of the contextual resources and understanding underpinning these views – whether those were implicitly or explicitly expressed. All, in all, my adopted paradigms as well as my own assumptions specific to this research question, enabled me outline not only what works for each participant - and eventually for most, in relation to their views per domain of the FI structure, but also why it works and under what conditions it works in the given Irish context. This is also acknowledges contextual variability, as the meanings made are broadly tailored to firstly the lived realities of each participant and secondly to the group as a whole; which we cannot assume provide universal views/or preferences to FI design (Madill et al. 2000; Braun and Clarke, 2022).

**Additional file 4:** Detailed results of the mNGT process

**Phase three results:** ideas generated and their frequencies per domain

| **Amount (€)** | | | | | | | | | | | | | | | | | | | | | | | | |
| --- | --- | --- | --- | --- | --- | --- | --- | --- | --- | --- | --- | --- | --- | --- | --- | --- | --- | --- | --- | --- | --- | --- | --- | --- |
| **Ideas** | **0** | **50** | **100** | **130** | **150** | **200** | **250** | **300** | **365** | **400** | **480** | **500** | **550** | **1000** | **1200** | **2400** | **6352** | **350-400** | **400-1000** | **400-500** | **400-600** | **500-1000** | **Other1** | **Total** |
| **Frequency** | 15 | 2 | 1 | 1 | 1 | 4 | 1 | 2 | 1 | 1 | 1 | 6 | 1 | 4 | 2 | 1 | 1 | 1 | 1 | 2 | 1 | 2 | 7 | 59 |
| **1 o**ther unique ideas such as 50-100, relative to person or cost-impact values | | | | | | | | | | | | | | | | | | | | | | | |  |

| **Form** | | | | | | | |
| --- | --- | --- | --- | --- | --- | --- | --- |
| **Ideas** | **Voucher** | **Personalised/Multi-use Voucher** | **EMT** | **Restricted Voucher** | **Cash** | **Other2** | **Total** |
| **Frequency** | 33 | 8 | 5 | 4 | 3 | 3 | 56 |
| **2** other incentive forms such as trophy, graduation ceremony and personalised vouchers. | | | | | | | |

| **Certainty** | | | | |
| --- | --- | --- | --- | --- |
| **Ideas** | **Definite** | **Variable** | **Definite with Variability** | **Total** |
| **Frequency** | 52 | 4 | 2 | 58 |

| **Target Behaviour** | | | | | | | |
| --- | --- | --- | --- | --- | --- | --- | --- |
| **Ideas** | Validated quit and attendance at clinic | Validated quit at certain timepoints | Validated Quit | Attendance only | Validated Quit in line with the service | Other3 | **Total** |
| **Frequency** | 19 | 15 | 13 | 5 | 4 | 1 | 57 |
| **3** other behaviours: engagement/setting a quit date | | | | | | | |

| **Frequency** | | | | | | | | | | | | |
| --- | --- | --- | --- | --- | --- | --- | --- | --- | --- | --- | --- | --- |
| **Ideas** | Weekly | Bimonthly | In line with services | Unspecified fixed instalments | Monthly | Every interaction | Other4 | Trimonthly | Quarterly | After 1 year quit | At quit date & specific timepoints thereafter | **Total** |
| **Frequency** | 9 | 9 | 8 | 6 | 5 | 3 | 3 | 2 | 2 | 2 | 1 | 50 |
| 4 other suggested frequencies such as: every 4-5 months, start after 3 month or variable. | | | | | | | | | | | | |

| **Magnitude and Schedule** | | | | |  |
| --- | --- | --- | --- | --- | --- |
| **Ideas** | Incremental increase at service timepoints | Fixed amount at certain timepoints | Other5 | Decreasing amount at certain timepoints | **Total** |
| **Frequency** | 27 | 11 | 9 | 1 | 48 |
| 5 other unique ideas setting out specific dates or a combination of incremental increases, decreases or fixed amounts. | | | | | |

| **Immediacy** | | | | | |
| --- | --- | --- | --- | --- | --- |
| **Ideas** | **Immediately/As soon as possible** | Other6 | Within a week | Within a month | **Total** |
| **Frequency** | 38 | 6 | 4 | 2 | 50 |
| 6 other unique ideas such as: 4-5 months later after scheme end, end of year, at discretion of advisor/client. | | | | | |

| **Target population** | | | | | |  |
| --- | --- | --- | --- | --- | --- | --- |
| **Ideas** | All smokers | Targeted by Socioeconomic status | Targeted by Smoking level | Targeted by Age | Other7 | **Total** |
| **Frequency** | 27 | 15 | 8 | 4 | 2 | 56 |
| 7 other ideas including: maternity and people with chronic conditions. | | | | | | |

| **Service Provider** | | | | | | |  |
| --- | --- | --- | --- | --- | --- | --- | --- |
| **Ideas** | HSE/TFI | Stop Smoking Services | Government | Healthcare services | Other8 | All/Any | **Total** |
| **Frequency** | 21 | 15 | 3 | 2 | 1 | 1 | 43 |
| 8 other ideas: third party. | | | | | | | |

**Full ranking list of frequently voted ideas**

|  | **Amount (€)** | | | |
| --- | --- | --- | --- | --- |
| **Rank** | **idea** | **Sum of scores (raw)** | **Frequency of voting (raw)** | **Relative importance %** |
| 1 | 400 | 60 | 14 | 17.9 |
| 2 | 200 | 36 | 13 | 10.7 |
| 3 | 500 | 34 | 8 | 10.1 |
| 4 | 1000 | 23 | 8 | 6.9 |
| 5 | 600 | 22 | 7 | 6.6 |
| 6 | 0 | 20 | 7 | 6.0 |
| 7 | 365 | 15 | 4 | 4.5 |
| 8 | 50_100 | 14 | 5 | 4.2 |
| 9 | 300 | 13 | 5 | 3.9 |
| 10 | 550 | 13 | 3 | 3.9 |
| 11 | Free Healthcare | 13 | 3 | 3.9 |
| 12 | 250 | 11 | 4 | 3.3 |
| 13 | Relative | 11 | 4 | 3.3 |
| 14 | 400_1000 | 9 | 3 | 2.7 |
| 15 | 350 | 8 | 2 | 2.4 |
| 16 | 1200 | 6 | 3 | 1.8 |
| 17 | 500_1000 | 6 | 2 | 1.8 |
| 18 | 130 | 5 | 3 | 1.5 |
| 19 | 450 | 5 | 1 | 1.5 |
| 20 | 440 | 5 | 1 | 1.5 |
| 21 | 50 | 4 | 1 | 1.2 |
| 22 | 1600 | 2 | 1 | 0.6 |
| **Form** | | | | |
| 1 | Flexible Voucher | 87 | 18 | 35.8 |
| 2 | Limited use voucher | 66 | 15 | 27.2 |
| 3 | Money Transfer | 34 | 13 | 14.0 |
| 4 | Cash | 21 | 10 | 8.6 |
| 5 | Multiuse Voucher | 19 | 4 | 7.8 |
| 6 | Digital Voucher | 11 | 3 | 4.5 |
| 7 | Physical voucher | 5 | 1 | 2.1 |
| **Certainty** | | | | |
| 1 | Definite | 101 | 21 | 54.0 |
| 2 | Definite with variability | 39 | 9 | 20.9 |
| 3 | Variable | 28 | 9 | 15.0 |
| 4 | Other | 19 | 4 | 10.2 |
| **Target Behaviour** | | | | |
| 1 | Validated quit | 52 | 11 | 27.1 |
| 2 | Validated quit at Certain timepoints | 43 | 9 | 22.4 |
| 3 | Validated quit and clinic attendance | 38 | 8 | 19.8 |
| 4 | Attendance Only | 37 | 9 | 19.3 |
| 5 | Other | 22 | 8 | 11.5 |
| **Frequency and schedule** | | | | |
| 1 | Fixed timepoints in line with the service | 45 | 11 | 27.4 |
| 2 | incremental increase at certain timepoints in line with the service | 31 | 8 | 26.1 |
| 3 | Once off payment at the end | 28 | 7 | 17.1 |
| 4 | incremental increase | 27 | 6 | 16.5 |
| 5 | fixed weekly timepoints | 12 | 3 | 7.3 |
| 6 | Fixed monthly timepoints | 10 | 4 | 6.1 |
| 7 | Incremental decrease | 5 | 1 | 3.0 |
| 8 | At the discretion of service providers | 3 | 3 | 1.8 |
| 9 | At two years quit | 3 | 1 | 1.8 |
| **Immediacy** | | | | |
| 1 | Immediately (As soon as possible) | 109 | 22 | 66.1 |
| 2 | Within a week | 24 | 6 | 14.5 |
| 3 | Other | 17 | 4 | 10.3 |
| 4 | Within a month | 15 | 5 | 9.1 |
| **Target population** | | | | |
| 1 | Targeted (Socioeconomic Status) | 77 | 16 | 33.8 |
| 2 | All smokers | 51 | 13 | 22.4 |
| 3 | Means testes | 43 | 11 | 18.9 |
| 4 | Referral Based | 18 | 5 | 7.9 |
| 5 | Targeted (Smoking Status) | 18 | 6 | 7.9 |
| 6 | Other | 14 | 3 | 6.1 |
| 7 | Targeted (Occupation) | 3 | 1 | 1.3 |
| 8 | Non -affluent areas | 3 | 2 | 1.3 |
| 9 | Targeted (Age) | 1 | 1 | 0.4 |
| **Service Provider** | | | | |
| 1 | Stop Smoking Advisors | 83 | 18 | 206 |
| 2 | HSE (TFI) | 73 | 16 | 206 |
| 3 | Healthcare Professionals | 29 | 9 | 206 |
| 4 | Other | 16 | 4 | 206 |
| 5 | Government | 5 | 1 | 206 |

***NGT Score:*** total sum of all scores given per domain on a scale from 1-5 across all participants

***Frequency:*** the number of participants who voted per idea

***Relative importance:*** (Score of each individual idea/ the total sum of all scores given for all ideas per domain) * 100

**Additional file 5:** Themes and supporting participants’ verbatims

| **Themes, sub-themes and categories** | **Excerpts** |
| --- | --- |
| **The Vessel and the value** | |
| 1. Form, feasibility and scope of the incentive | I suppose in terms of the vouchers. I wonder if our hands would be forced in terms of the systems that are available to us - I suppose I have to keep it real as well" P04, Longford. |
| Is it voucher- vast majority people said vouchers? Does it need restrictions or should it be universal? Could it be individual? Does it have to be, a contract option? It doesn't have to be, somebody said it doesn't have to be financial at all, it could be a certificate.!" P10, Limerick. |
| What we've heard in the room here today about vendor restriction and that they don't have Aldi and Lidl and Dunnes. So, most people will have a choice in how they spend a One4all voucher but maybe we do need to look at some - corporate partnerships with big supermarkets and things like that. Maybe give a kind of choice of type of voucher that they can take away. Here's a question maybe we can we can take away is: do Aldi and Dunnes take any vouchers, or only their own ones? Also, the admin fees? That kind of stuff aside, their lead times in terms of how fast to get them out to people?" P12, Limerick |
| You needed passports and things like that. I think that was the reason for some of the other prepaid debit card type platforms is that the registration and activation process seem to be particularly cumbersome for someone who might be digitally literate." P03, Limerick |
| cash the least- preferable because this just would be administratively impossible" P13, Cabra |
| Please don't go with cash that just gives me a palpitation I just, I don't know how that would ever be managed. I said no to cash. A voucher sent directly from the national office which would reduce workload for stop smoking advisors." P 13, Longford |
| I'm saying voucher, but a voucher that can't be used in a general store for buying cigarettes again." P16, Longford |
| I said voucher and I think the stop smoking advisor shouldn't be in any way responsible for giving it out because I think you let people coming into the clinic and …, trying to persuade you to [give them]. So, I think it should be taken well out of the realm of the stop smoking advisor. " P4, Longford. |
| because I first wrote down, cash is king, right? Then I thought, maybe actually, money transfer, but then what if you don't have a bank account? But, again, the whole thing is that this is a pilot, so it is interesting to see if you give somebody something that isn't controlled, [ ...] it's a voucher for this particular thing" P18, Longford |
| And voucher as well for multiple, kind of, multiple options of the voucher, multiple stores Yeah, the electronic money transfer, we were looking at that, and I think it's, you'll have tax implications, potentially, and just give cash to people, so it's [electronic transfer] right it would be, for the reason that it would, it would involve tax implications. Whereas a voucher, you are allowed to have a voucher for a certain amount without changing or declaring it. as an income." P3, Longford |
| If people were rewarded, I believe a voucher system would be best suited, but only to be used in certain stores and on certain items. So, I guess a restricted voucher there." P11, Longford |
| There was somebody suggested as well, when I worked in Saudi Arabia, I had to do an Arabic course, and we had to pay for it, so we had... But at the end of the completion of the course of a year's time, we ended up that if we had done the duration of the course, we got our money back. And at one stage, I remember saying to TFI, can we take money off people and for their cigarettes, and give it back to them at the end of the year. But then I was told, no, we can't be responsible for somebody else's money… But to me, that would be really..." P4, Longford |
| I suppose there is only electronic transfer So, I think that would be too complicated. Yeah, to administer. Like, we don't give out money. We have no process for giving out money. And then, do you see really where it's gone?"P8, Longford |
| “I used to work in mental health and we used to give a kind of stipend to people, like, who volunteered to be involved in different things...It's called a remuneration scheme. And it got into, like, tax and everything like that." P9  " Tax clearance. So, we don't want to do anything like that Gathering tax clearance starts for him. Or, you know, the people would be, maybe, get restricted from their employment." P3, Longford |
| “I can only speak for myself, [name]. I'm only in its infancy now. just on the various day we're going through what now I nearly three months so I don't know what's going to be like after the fourth month or six months or a year but what's helping me is the vapes no the inhaler not the vapes the inhaler and the odd patch or two and at the same time, I don't want to OD on nicotine either which is a danger. So, I think the longer that I can still have that in my hand. That's psychologically helping me. And I'm sure there's thousands that would agree with me as well. But there's going to come a cut out point where to buy these in your pharmacist is it's 30 quid a box per item whether it be the patches or whether it be the inhaler so that's where I'm coming from.” Cabra |
| “Personally, I think it would be something health wise, I mean you give up smoking and then you always have another addiction the minute you give up smoking. It’s either, you have, it’s eating sweets or ... So, health wise it should be either like a gym, travel. Something around that or even in the HSE. it should be bigger where you sit down and you’re told “well you’re going to start eating stuff” it should be health wise, because the HSE is over health." P17, Cabra |
| “I suppose free healthcare, not, just a free voucher, but as you said as well, that they couldn't take it to any shop because then they'd buy cigarettes and that. So, it would be subjected to either gym membership or whatever. So, you can change that terminology if you want to, like, for the free healthcare fit. But you'll understand it later on when you're putting it in this number one choice. " P13, Limerick |
| “Spending money on the NRT, it's a good idea, but it's not really practical, I think, because not everyone needs NRT past the 12 weeks, but there are people who can't afford them, could be beneficial, but you know, beyond the start, give them extra energy" P6, Cabra |
| "I suppose I’ concurring with what you’re only after, and you might say, where am I basing it on? I'm actually basing it on what patients would have said to me, because patients would actually say to me ""if I really wanted to quit smoking, I will go and buy this nicotine replacement therapy"". And I just look at, even with the free nicotine replacement therapy at the moment, the people that think to themselves"" oh, there's no problem relaxing in this here, because I can get again"" even though the standard is that you can only get it twice within the one year. So, this is why I would very much concur with what you are saying. But then maybe [..] for example, for people that find it difficult to go to appointments, if it was something like a reward, or say like giving them a travel card to get there [to the service]. And I'm relating that back to even alcoholics that I would treat with; you give them money, they go out, they buy booze in this here as well. But if you give them a ticket as they say to us, I need to get to Dublin for an appointment, and you end up, you give them a money, and then two minutes later, you see them worming into the pub. But if you go, literally, give them a ticket, there's your ticket for Dublin, they can't do that. I think there is positive to it, but I think there's also negative to it, and I think we have to be very careful about how we do apply it."" P4, Longford |
| A voucher that you can nominate what you want to spend it on yourself, that doesn't happen to take the money off itself." P10, Cabra |
| I’d be more inclined to look for a type of a club card where the longer you stay off the cigarettes you can see the money building up. People say that, think of the money you will save, I haven’t saved a penny out of my cigarette money but if I had a card where, especially coming up to this time of year getting close to Christmas, and I would have the money aside there I could go up and just cash it for Christmas, a good eh… a good knee up or whatever... If it's in my pocket, I’m going to spend it. If it's on a card, I’m looking at it building up and I’ll only use it when I’m stuck." P18, Cabra |
| “I'd go for a voucher! If you get a voucher, you're more likely to get something nice for yourself it's like a treat or reward. If you get cash, it just gets swallowed!" P01, Limerick |
| “I think what one of the women was saying, which I thought was very powerful,[name] was saying just about that if she got a kind of a general voucher, and this is what we found, with WeCanQuit is that some people wouldn't spend the money on themselves and that's why she was kind of saying getting a voucher for like a health spa where I will treat myself rather than getting a voucher for Dunne's or somewhere where I'll just go and buy the groceries for the family so yeah I thought that was a nice idea." P1, Cabra |
| “Give people choice! so I think people get to opt out "would you like it on the day would you like it…once a month” because some people might like accumulatively and to kind of save it up" P04, Limerick |
| “...The vouchers that may be available have to be relative to where the program has been targeted. For example. if it's only marginalized communities, we have to know what facilities are available in marginalized communities. One question might influence how we answer the other, if that makes sense! You know in terms of the importance of this. It's not, I’m giving a brown Thomas voucher exactly like there's no.." P12, Limerick |
| 1. Valuation of a difficult achievement | “To make it worth their while. I mean, when my eldest daughter started to smoke, I stopped her pocket money by the price of a pack of cigarettes, and she still smoked, and I stopped her by the price of another pack of cigarettes, which was down to no pocket money, and she was still smoking!" P7, Cabra. |
| "... I don't know whether a monetary value like that is right. I think maybe it has to be relevant to the cost of the person is incurring on a weekly basis or a monthly basis or whatever so that they know: okay, I'm giving it up."" P05  F: So just check that you're not talking about the nicotine patches or anything like that, you're talking about the actual cost to engage with the service travel, or child minding, or whatever.  "" Yes, yes. Because, as [name] is saying... I was going to say, your clinics are maybe easier in Dublin, where it's, you know, they're in the middle, they can get buses in this here.” P05, Longford |
| “… But I was thinking that if it was, if I did decide that it is a good idea then I would have thought it would need to be a significant sum. Now, my significant sum and [names]s' are very different. I would have thought somewhere around 50 or 100 euros." Longford. |
| “The incentive itself is what I'm curious about. what is actually going to incentivize somebody to make this quit? because when you weigh up the cost on the other end, it is, it's huge amounts- of cost of the health service, and just to see purely from the pilot point of view, if it was cash, that's what I would kind of look at the moment" P18, Longford. |
| “But I'm looking at it through a sociology, child, early child development and community risk lens. So, I don't see it spoken as an individualistic behaviour. It's seen as an inevitable behaviour that we give in the right circumstances. So, if you think then of the cost impact when you're 55 [explains associated cost of smoking] thus then the outcomes later down the line to the behaviour. So, I think the money could be very tokenistic. If I say 50 or 150 or 200 or 300, in some ways it could be like a middle-class approach to a working-class problem. But I understand the value of the carrot and stick piece. Um, so by the time I got to the end of the question, I was thinking, but it could be given that amount there, at that point in time; I'm sort of honing in around that 400 mark. But cost impact, you could probably scale it up to 4,000, easy enough." P4, Longford |
| "But the incentive might help bring them in the door, and then they get the service, and they get there…" P3  "That's the thing that I would say, I would agree with you 100% there, and that would be what you would be hoping, with this incentive, get them in the door and my whole thing about is keeping them in the door in this here, because when I'm looking back to before we ever went into patient management system, years ago, before, we just had to keep our own records in that, and the number of people that was in the doors there, and the number of people that was quit, and still from, we provided this free nicotine replacement therapy, I can see a real difference, to be honest with you, and this is what concerns me, because, again, I think, it's the nursing bit off me, we're shouting in the hospitals, they've no staff, and all these other things, and here we're talking about spending out 3,000 euros, camper vans and cars, et cetera and that would put a nurse in the hospital" P16  " The average admission is 7,000 euros." P3  "Oh, I know that, I know that, certainly per person, or three-day admission. Yeah, that's right, and that doesn't even include their outpatient costs afterwards, do their GPs, so I'm very conscious of that from that perspective as well, that certainly, that's where you will be wanting, don't you" P3, Longford |
| “There's motivational theory would be useful to consider there's a class difference, especially with a product like smoking, where there's possibly multiple failures, I think you have to think about building self-confidence in your ability to achieve. I think has to be considered with the context of... you're building confidence. And then those motivational forces at play, it has to be enticing enough to move to it. So that has to be considered that there is a class difference, social scholars show that. And those individual motivation forces are, they're always at play. So, it's weaving that in, it's just a general population." P2, Longford |
| " No, a trophy, a trophy, so, that it lasts forever." P13, Limerick. |
| We feel a meeting with graduation. On a certain day or times and then we have some form of recognition of the difficultly; how difficult it is to give up smoking. Have some sort of award.” Px, Limerick |
| "I imagine 250 is at graduation ceremony they get their last reward on the day, to acknowledge they’ve given up smoking, some people are so proud they have given up smoking it’s important you recognise that average."-P00, Limerick |
| “...recognising how difficult it is for people to come along to groups and then I think it should be weighted so that as to go along the program and quit, there be higher incentives as we come along the journey if that makes sense. Then I head down as well, that the big thing is at the end of the program, the graduation piece I said that earlier on, so basically at the end they get the final payment if you like but that's the biggest and then a physical trophy in recognition of it so it's not necessarily a token or a voucher but it could be a trophy, or a coin, or something." P12, Limerick. |
| “Can I just, just to throw another bottle, there was some really interesting research that emerged during the economic crash, and how people are motivated [..]. Some people they want the rewards, and some people are happy like squirrels, they're happy to put it away, and knowing which is important when we're, and then when you think about relapse, a trigger to a relapse, when we think of the context as well, is it more, feeding the person with a system that's designed to encourage them. So, it's complex, But I find the social research that came out fascinating. because that's all woven into motivation, and, what drives your driving forces [..] so motivation, I think, with interpretation of time, six months can be a very, very long time. You see this in education, actually. People are happy to do your PhD, six years or so- so happy that you go in the long haul. Some people they want their certificate after 12 months. Even that's the long haul." P 2- Longford |
| **2. A standardised system amidst an ever-changing individuals’ reality** | |
| 1. Needs of a system | “Not creating a separate, incentive scheme that isn't in line in with the current, because otherwise it's a big day’s work and it's a big waste of space and we should do everything to support what we're already doing." P-11 |
| “So, I have a preference for a schedule that aligns with the services whatever they are I think is probably the easiest thing for everybody" P11 |
| “If you're honest, the thing is how will we manage that, if there's some degree of flexibility in terms of what was categorised!" P02 |
| “So again, whatever way that is put up, you know, it's going to have to be standardised. " P4 |
| "Definitely a fixed sort of schedule. Like the quit program is quite structured." P2 |
| “I think it should be kind of a structure in the beginning that we make, so and they know what they are signing up to, just to be able to describe it up." - P0 |
| “That's why I think it's very important with the messaging at the outset about how the incentives are given and why they're given. For scenarios just like that, that if they, for example, want to keep their money for the end, that it's explained if they drop out that this is what actually happens and why." P13 |
| “And even thinking of the software you're working with. Maybe it's nice to give that map [Flowchart info] to the client coming to see you as well. That's in the service, that they could pick up at an Anpost or a GP surgery and they and they can see when they can potentially get what amount" P12 |
| “I think even in terms of like providing tools for the advisors that are going to be working on the program that there needs to be like a flow chart which will have definite things that happen at definite times and I think having a chart in front of you, whatever it is, week one equals X amount, week two equals X amount, and that we follow that. And it probably just gives some standardizations to work." P08 |
| “I just think it is really important that it’s really clear for the person sitting in front of you that this is exactly what is going to happen." P9 |
| "... It would be too difficult to have dozens of different programs designed. So, I think it's best for us to think about one-size-fits-all if we can for the pilot anyway. So, I know you don't like it."" P11  “We put it all together, because it would be too... If you think about it, it could ever be rolled out nationally in the future."P11  "Because we've got one IT system and like just like administrating something like this, it would be.... then even from a communications point of view [e.g.,] I'm living in Longford, so I'm getting 500 Euros to quit. I'm living in Dublin; I'm only getting 300. Or, you know, I'm getting [them at] a different time point. It would be a nightmare." P08 |
| 1. Recognition of diversity | “[ recognised importance of structure] ...But I think we need to recognize the different differences either group and individual, to be able to respond to that. Everyone learns differently, everyone responds differently, and there should be flexibility in that need, if that makes sense. Yeah, we've seen that happen to a couple of groups we've put on in the past; some groups take longer to get through the content then others and all of a sudden, the group contracts, they'll be still on for the next few weeks so I think the response to that is what’s needed to keep the group around" - P0 |
| “Can I just say I understand why it's important to stick to structure, but I suppose my concern with that is it will appeal to and it will work more with certain persons and those who maybe don't have the supports around them to the same degree which are the people we're trying to get to support, I think we do require a little bit of flexibility-P04 |
| “.. I think it should be fixed but with the caveat that there is some bit of leverage depending on circumstances within the fixed programme" P4 |
| "Because unless you were having, like doing any research, for example, unless your cohorts are all basically the same, so therefore like the other two geographical areas would their cohort be very like Longford from the point of view of being marginalised areas? Yeah, there was some of them are urban." P12  “So, do you take, and as we were just saying at lunchtime, different geographic areas are so much different with the people that they have in them? So, do you just bring these designs back from us to the Longford, say, area one? It would be too difficult to have dozens of different programs designed. So, I think it's best for us to think about one-size-fits-all if we can for the pilot anyway. I know you don't like it. We put it all together, because it would be too... If you think about it, it could ever be rolled out nationally in the future."P11  "Because we've got one IT system and like just like administrating something like this, it would be.... then even from a communications point of view [e.g.,] I'm living in Longford, so I'm getting 500 Euros to quit. I'm living in Dublin; I'm only getting 300. Or I’m getting [them at] a different time point. It would be a nightmare." P08  “There's a very big difference though in the populations of the areas in that we have a very low rate of referrals here possibly compared to even what you'd be having in Cabra or Finglas. So, I don't think you can compare the two, even though they're both Sláintecare areas and they're both deprived and disadvantaged. They're not the same in that regard and you wouldn't expect the same throughput of smokers through the clinics." P7  "But isn't that why there's a pilot? That's why we're doing a pilot, to learn. Your referrals and increase the number of people that are coming to a service. But it'll probably still be a small service because it's Longford and it's a smaller population. But that's okay. You know?" P8 |
| “There's always new areas [of priorities/needs] and then there's a balance to structure, I mean, personal control."P07 |
| “Can I just, just to throw another bottle, there was some really interesting research that emerged during the economic crash, and how people are motivated [..]. Some people they want the rewards, and some people are happy like squirrels, they're happy to put it away, and knowing which is important when we're, and then when you think about relapse, a trigger to a relapse, when we think of the context as well, is it more, feeding the person with a system that's designed to encourage them. So, it's complex, but I, I find the social research that came out fascinating. because that's all woven into motivation, and, what drives your driving forces [..] so motivation, I think, with interpretation of time, six months can be a very, very long time. You see this in education, actually. People are happy to do your PhD, you know, six years or so- so happy that you go in the long haul. Some people they want their certificate after 12 months. Even that's the long haul." P 2 |
| **3. Accountability, validation and pitfalls** | |
| 1. Gaming vs trust | “I just think whatever you've given will be abused. As soon as I see an incentive, I just thought, if you've got that handy quit smoking, you could rightly milk the HSE for a few thousand a year." P-01 |
| “Again, abusing it like, that'd be my biggest fear giving them financial, they're saying they're giving up, and then, as [name] said, going off on the, you know [cigarettes]." P19 |
| “I kind of feel like something between 400 and 500 is enough to incentivize people but not too much to kind of encourage kind of taking advantage of it. I think 1,000 would maybe encourage more people to avail of the service that maybe wouldn't necessarily engage for the right reasons." P13 |
| "If I had to give a number, I'd do €250 over the 12 weeks, like, in instalments I think whatever financial incentive you give, it's just there for the taking. and if I’m trying to quit now if there's an incentive coming out next year, I’d nearly look at it and go back on fags for a week. Yeah, I looked at it exactly like that"-P01 |
| "Well, the early stages, when you're seeing them kind of weekly, and you're less likely, but it's the, if there's payments that are scheduled for three, six, twelve months, like, it's very easy to just say, okay, well, there's a hundred euro coming out for me in a week's time, so I'm going to either quit, or I'm going to vape because I know it's just to see what you're reading, and that, not everybody will be like that, obviously, but, I suppose, some people look at these things as free money." P19  " I know, yeah, but there'll be a game, there's a certain amount of gaming with every kind of thing. There's always someone trying to scam something" P8 |
| " So that's not like a one-size-fit-all because a lot of people would see that and just go great and get money for nothing and just do it and then back on cigarettes. I would say that I don't think it's enough incentive I think it needs to be like a schedule thing." - P5 |
| "There's nothing in it for them to tell them lies. Do you know what I mean?" P8 "There is something in it and it's endless saying... Yeah, because you have incentives. Don't you have to use judgements? Especially dealing with marginalized communities. And any little bit of extra money they can get is what they need, yeah. " P19 "And as you're saying, you're doing a group, they talk within the group amongst themselves, even what their carbon monoxide levels is. So, say he's doing somebody and the incentive is four parts per million in this year. And then this person says, say, nine, and you say, oh, sure, they have a chest infection. We'll give it to you then next week, sure." P7 |
| “I think you might be trusting a person to come along and say they are quit, saying they are no longer smoking only for them to come out and then smoke! [importance of a test] to see if they are committed" P13 |
| "That's not good enough. The carbon monoxide reading, I wouldn't say, is good enough, because it's, it's, open to abuse" P 19 "Yeah. Yeah. It is potentially that's the way they do it in the UK. I mean, the other option is that you add in potentially cotinine., but you have to consider the expense of that as well, and the logistics of the lab, and all that. And the time that it would take to verify, get a sample tested and get it back. We’ve done it for studies, we did it in the Irish prison service and all that we have done cotinine testing in the past, it is possible. So, it's all up for discussion, that's why we're here." P3 |
| “I think it needs to be with more than just the carbon monoxide testing, to be honest with you, because there's a way around it." P4 |
| "You can vape and you can kind of, like it doesn't register on the test "P04 "And the other thing is, as well, even like what [name] saying there, if, say, you had a patient that had, that was smoking, if they didn't smoke, say, for a day, basically, or two days, and we were going on their carbon monoxide level, they would be coming in as one [score] on the carbon monoxide level. So, we've no way of actually knowing." P7 |
| “There is a certain amount of trust expected from our clients and I suppose it’s reassuring that the research and the realist review and things it doesn't speak about deception really. Of course, you'd expect a little bit but I certainly don't think it's the norm. I think most people are upfront and honest and I think they probably want people that continue to come back to clinic and they probably want to do the best for themselves. There's probably an element of trying to almost please the advisor as well then too at that point." P11 |
| 1. What is and how to measure “commitment”? | “...but I also I would have said no at the start because I was thinking so many people might abuse it, but I also know how important it is for people at that very first time you are going in... I’m not sure…and the first few weeks are the hardest so it might help, I’m just sort of torn there" P6 |
| “The problem with rewarding attendance and setting quit days is that it's too gameable and we want to try to avoid having to have those discussions in the first place, I think." P19 |
| “Definitely think it’s a bad idea to get the reward on the first day, that you just walk in, I’ve no money for cigarettes. I’ll go to the smoking place and they’ll give me money to buy a packet of cigarettes. So, eh There should be, yeah, a month or two months, down the line and then they’ll look at it and say, you have been off them for that length of time, yeah we can cover that." P18 |
| “I was thinking that you shouldn't be telling everybody in the public that there is an incentive to give them, because then they'll just kind of say, I want to quit, and then they're just there for the money but not for the health benefits - I think it's really, like, when they go into the HSE, and say I really want to quit then you tell them, we'll actually you’re going to be incentivised from here on as long as you attend like twice a week and blow into the little machine" P9 |
| “I suppose in terms of the validation, I think it will be dependent on how we communicate the incentive as well. So, like, if there's big communication about it, and we're getting lots of people through, maybe we do need the cotinine. but we trust, we trust the clients that when we check the carbon monoxide, that they've quit, so- I don't know if it would change. If we're not communicating it massively, that people are coming through, they're getting an incentive, what's different about, is there a reduced level of trust there, because, and maybe there is, because there's not an incentive." P4 |
| “I feel very strongly on this, I actually feel that people should only get rewarded for a validated quit, so I think that administering this with any kind of subjectivity will be impossible and I think what would happen is one service might provide it in one way or another and that could end up backfiring and I think if people know if they come in with the intention that I'm going to get paid to quit and that's it the message is very clear people have the same goal if you start moving the bar I think that we could undermine the whole thing." P4 |
| “This should be given after they have quit for a certain number of weeks." P11 |
| “You'd have to get yourself back to where you were and then carry on. Yeah, to catch up on yourself" -P03 |
| “But it's also the understanding that you're not just going to get something for signing up to a program without it is a continuous effort." P7 |
| “You do the leg work [engagement in person and validated quit] and then you get it [ the incentive]- P12 |
| “You can nearly see how hard it is for people, you know, to keep the momentum and keep the level of commitment going. And that might incentivise them. Again, I suppose, looking from my own point of view of recruitment and all this, the carrot to get them to attend. And I like... Sorry, [name]'s theory on having a welcome pack, or something I don't want to be, to get the attendance, because I think it's to get... The carrot is to get them in the door."P5 |
| “... actually, you can’t put everyone in the mainstream so I would be saying you know towards two things that you would need to achieve; if they were engaging and if they are showing a lower carbon monoxide reading, perhaps they would be rewarded." P-08 |
| “No, I think if you have introductions, like if you could give someone a voice up or down introduction, ...But after that, I think it should only be given out once the proof of the CO2 is getting better. And the more, the longer you do better, the more you get" P03 |
| “But I think interacting, being there, linking in and as they go on as, say if they're blowing less CO2, they should be given a voucher. As I said a while ago, if they're two weeks after they're blowing even lower, they should be given a bit more. Because I think if people were to wait six months, I really don't think that will work because they could just do it on their own in the meantime and save the money, they could buy all the vouchers they wanted really" P03 |
| “…but I really only think there's one thing that we can do here, and that’s a verified quit and again, it's from a defensibility standpoint, so I think we probably need to make ourselves as bomb-proof as possible for talking about this publicly." P19 |
| " And I think that you have an excuse not to give that lady the incentive, even though, when you're fixed up, come back in to me, we'll do another test and we'll keep going as we were. Rather than saying, oh no, I give it to you, but don't tell Johnny in the next period. I know that wouldn't work. It couldn't work. It almost has to be very black and white, and you can blame the contractor, the thing. You don't blame yourself. Oh, no, the agency won't let me give it to you. And TFI won't let me give you this because your CO test is a score of 7 a day. - Now, I know that's below the usual time but you signed up for the incentive. Yeah. That's the way I'd see it." P11 |
| "Can I ask then, so obviously you're concerned about time wasters coming in, essentially. Do you think that there's any value getting extra people through the door, even if quite a few of them fall off after the first [meeting]? As in do you think you guys are able to convince them to stay? - like they're really here for a jolly but actually they've had a conversation with you now and maybe you'll convince half of them to stay for longer.""P11 |
| “My only issue with giving something at the very start would be from a service point of view would we get an influx of people that just turn up, so I would be no to that... So, it would just put pressure on [service providers]"P6 |
| “Second I just did the least preference is just for attendance only that we were given a voucher for attendance only I think it would be hard to defend that kind of position in a public space" P13 |
| "We definitely have to go ahead and figure out a criterion, because if not that would just cause uproar" P7 |
| “So, you're allowed to catch up on yourself as a word." P04 |
| ". This final problem is that you're allowed to catch up if you have a lapse that you don't necessarily get punished, that you're allowed to re-join an appointment. " P07 |
| "A huge thing that came through in a previous workshop is don't punish people for relapses. Don't punish them for failure.” P11 |
| “And I think that, as you say, [allowing people in after a relapse], that would be the encouragement of it, because you would be coming in, and you would be saying, because, like, we know as practitioners, when people do come in, or even if they have relapsed. Like, I had one in yesterday, and she was saying, oh, I relapsed over the weekend. It was a terrible thing I could do. I could come in and tell you that I hadn't, because I know my carbon monoxide should be back. But it's all that. Well, that was encouragement. Look how well you've done. You could have gone back on the cigarettes, but you didn't. You stayed off them. And now, look, let's see your carbon monoxide today. It was five, but that's great. It's still underneath the ten, and next week it'll be back down, hopefully, to two-sort of way. So, as you say, there is that big sort of way with them all the time, and as you say, that's a good piece to be doing with them." P16 |
| “There will always be the odd one who will be an outlier. I'm just thinking of somebody with a COPD exacerbation or whatever. You won't be able really to get them to do CO testing. So, it's just those little things might be a flexibility around them, you know, it would be a rare thing." S06 |
| “...I think we need a fallback for validation because if there is a dispute. I'm just thinking, in the past a painter came in who had quit but he had a really high carbon monoxide level and it was because of the solvents or whatever he was working with. So, I think we just need a fallback in the case of a dispute." P02 |
| “Or what do you do, say, hypothetically, again, this is a holistic care that my poor patients get, but at the same time, I had a patient COPD in that there, came into clinic, I could, know her chest was terrible anyway, so I did, she hadn't smoked her anything, I did her COPD in this year, and it was actually 15. I rang her GP and said to the GP what I'd done, and I said, I'm sending all a letter, this is what I feel she has, a chest infection, et cetera, et cetera. So, she had chronic bronchitis, you know, sort of way, put on antibiotics and steroids. It was like that for two weeks, it went down slightly, and then yesterday, when she was in, it was five. Now, this woman hadn't smoked for three weeks, but still, what do you, saying, like, she's coming in, and telling me, I could be able… Because of the fact, the way that her lung’s function, and they say they don't function properly, because of the COPD to begin with in the day, and then they're not able to exhale their carbon dioxide properly the way that she'd been. No, no, I came across a lot of patients like that " P7  " Even recently, the CO2 region was up, and they were chesty, and whatever." P19  "Yeah, and even, sometimes, even from the point of view of, say, they might not even know they have a chest infection but you said to yourself medically-wise, oh, I know this patient, and then you’re writing letters are ringing the GP, and the GP's getting back to you, and saying, oh, actually, I did an ECG in that person. Like, they had a brief atrial fibrillation, et cetera, et cetera, and thanks for detecting that, because otherwise, no, no, no. " P7  "Yeah, I don't know, I mean, those are nuances, like, you'll have to kind of fit back to that in. CO2 is the other option." P8  " But there are always going to be anomalies. And they're a bit of common sense, guys. Like, they're running services for years. Like, this, I presume this isn't going to fix everything, is it, [name]? There has to be a bit of..." P12 |
| “[Chest infection cases] maybe you need to cotinine at those points."P8 |
| “I wouldn't like the idea of giving somebody a urine sample for CO2, I think that maybe just saliva test before. I just feel it's kind of like going down a different route, maybe when you're drug tested or something like that. It kind of has a different association, I think. But maybe just the, the cotinine test and with the carbon monoxide. And I think that idea of just kind of maybe like doing a spot check." P7  " Yeah. You might not even have to do everybody. It's just that they know it's a possibility.” P 19  " It changes the tone of the interaction. If, if you're not trying to catch somebody out, but you're, you want to make 100% sure that they've quit. It changes the interaction that's happening. Um, like, if, if this initiative is another tool to use on top of the basis, the interaction and the program, the nicotine replacement therapy increases chances and incentivize quit adds even more. You just need to make sure we don't change the tone of what the service …. you can hoodwink many different ways. If somebody's trying to catch you out. But then, so, so what? If somebody's coming to your clinic, right, you get the argument, right, free money, but it's not a significant amount of money. Unless it starts with four grand! So, if we go down to " I actually want to do a, a, a random test to you" That brings us into that sort of drug testing space. And it does have connotations... but what the actual service is about giving people the optimum opportunity to overcome a product that is optimized for human consumption. And it's highly addictive. Um, I would not like to see mistrust weaving in." P2 |
| "But there's, that's where[name] was talking about, was talking about the urine test in this year, and you wouldn't be telling patients, you're going to get a specimen, and, oh, [name] was saying to me, I'm not a nurse, I wouldn't be comfortable in doing that. It's just like doing a lab test, it's not any big issue in doing it, or anything like that, but, at least, if you weren't saying to your patient about that we have that extra thing there, and we're just introducing this at the moment, and seeing how it works. It's like, when we brought in the postnatal depression scale, you were just, you weren't wanting people to feel, oh, why are they doing this in one cohort, but they're not doing it at all, but we're just doing a pilot of this to see how this works” P7  " As I said, as part of it, one of the first few things that you're kind of teaching them is how quick the CO2 will use your system when they quit, or when they stop smoking."P19 |
| **4. All, one or some** | |
| 1. The ideal universal vs real-world constraints | “At practical level, I don't think there'll be a budget to give it to everyone that's, I think it should be targeted, maybe medical card status, maybe unemployed, people who are more in need." P14 |
| “We will give it to everybody that sets the quit date currently in the service, which costs 5 or 6 million! |
| “I think if the budget is available, but I think it shouldn't be a case of you have to have Medicare. If you're in the maternity, which is a group that you really want to incentivize people smoking, I don't care it doesn't matter whether you're on the medical card or not. That is a very important group that you engage." P12 |
| “Not for lack of wanting I think to be able to do it for everybody that's most, I think that would be utopian. It's not manageable in terms of budgets and it's never, it's not something we'd say publicly." P19 |
| “…but I'm only considering because we may only have a small pot of money to play around with, ideally universal for me, but I mean just, we are working from a place where there's limited resources" P12 |
| “I think everyone as well, but 18, 19-year-olds, early 20s. I think people in old folks' homes, that they might be using nicotine as a crutch, a mental crutch. I think people like hospital porters or that might be smoking in the HSE as well... so kind of HSE workers, that would be, cleaners, porters, nurses, whatever it may be." P03 |
| “... I think it should be open to anyone over the age of 16 like it should be brought down to younger, like you walk the streets every teenager you see, like most of them are smoked, they are all dead, dead and everywhere, so like even through sports clubs, schools, stuff like that, start targeting, just science nipping’s, colleges even, like it's college campuses. It is very hard one to work, but like with the financial incentive, you see it with minors, financial incentives get people to go to school! It works! Anything for a bit of cash!" P01 |
| “I suppose, ideally, it would be everybody in the Sláintecare community, but then I'd put like, if it is looking at people with disadvantage, I'd put people on medical cards, GP cards, and carers, and I think- I wouldn't necessarily have them, because the cards are means-tested and things very hard to get. I just have anybody who's caring for somebody, I think that puts extra pressure on people. And I just said, like, groups, like maybe pregnant women, young people, they can't reach groups. That's basically everybody." P9 |
| “No particular group either, there was massive groups that might have been different, none of them felt that it should only be for us" P14 |
| 1. Priority groups and recruitment measure | “I said everyone but if there's a limited budget, I'd be targeting maternity mental health, we can quit and [People with] chronic disease will be behind. We can quit; I would just pick out cohorts or groups to target and chronic disease" P06 |
| “… depending on the budget that's out there. I'd go for marginalised communities only, not just We Can Quit, but maybe the standard treatment as well, if they're from marginalised communities. and then my second option then was those who failed the previous standard treatment program" P12 |
| “Geography within the geography. So, we have the map that outlines the areas of highest levels of deprivation, but you’ll have huge pockets that are in the red, who are obviously higher needs in terms of smokers" P3 |
| “Well, that's what Sláintecare did. So, the 20 areas that have been defined have been defined as the highest level of areas of deprivation of need. so, they're defined and that's where the investment and your posts came out of but then even applying that at a practical level of service can be tricky who's in exactly there" P1  " So even in that geographical map there are there are pockets that are higher so how to get those hard-to-reach people " P3  ".. are people who are affluent yeah" P1  but it’s just something to consider when we are working in these areas., there are hot pockets of stark deprivation and just down the road there are affluent areas." P3 |
| “We do need some sort of criteria to but generally, whether it's an address or whether it's a medical card, maybe go down that road within an area, like have a certain criterion, like a medical card" P1 |
| “Yeah, I'd like a criteria list so you could just be on your own quit manager and I’m meeting someone, okay I just enter this and Bing! oh, they're in red, they're in red, deadly. Now have they got a chronic illness, have they got this this and this? Yes, then they can go." P6 |
| “Some form of means test but either a medical card or GP card or some way of doing the means test rather than asking people's incomes you know some other criteria that would be easy to administer and then Slaintecare, if you live in this area now recognizing that you will have some people who are affluent living in slaughter care and it has been tricky in the past to try and administer free NRT just in Slaintecare areas. And then the least preference would be all smokers, not because I wouldn't like to kind of give every kind of help to every kind of smoker but just politically [and] financially trying to kind of articulate that would be tricky." P13 |
| “I’d go for medical card holders myself and the chronic health people. Um [as for] all smokers, I’d have to say for number one basically on the bases that you're talking about" P2 |
| “So, for number five I was saying living within the Slaintecare area plus a selection criterion but not the same as [name] where I think you were saying you'd have to meet all of them below, I'm just saying that it would be Slaintecare area plus if you meet one of these, whether it's means tested whether it's unemployed whether it's chronic disease whatever it is, but there would be Slaintecare plus one other thing, and then the quit manager- goes ping." P1 |
| “But essentially that's everyone in Slaintecare, because anyone in Slaintecare could be pregnant, could have a mental health condition, could have chronic disease" P13 |
| “So, for this study we will be limiting to three areas because it's a pilot, but the intention is to see how this pilot goes, apply for money to the department and then have it wider." P13 |
| “I don't know perhaps it should be means tested or lower income people who have shown to smoke more would get a higher monetary incentive. But there's no value given in that one." P11 |
| “So, I put people living in the Slaintecare area, which we already know is defined as disadvantaged community. But I also put medical card GP card, because we have some people who are quite advantaged living in those areas. And historically, before we had free NRT for everybody, we had free NRT for just those- in Sláintecare areas and it was quite difficult to kind of determine where's the boundary and the border and all of that. And you don't want to leave it up to the advisors to have to make that decision. So, you need something very definite that's easy to administer and that's you're either in or you're out and it's a pilot, you know what I mean? So that's why I put that."P8 |
| “I had initially written down disadvantageous groups, lower socioeconomic groups, query multiple cardholders. Then again, I have, does this further increase perceptions of inequality? Again, because you have to working middle class. If there is even such a thing as a middle class anymore that's getting squeezed so there's going to be questions around that. So, I say anyone, anyone in the target area that you're going to roll it out in. So, whether it's Slaintecare or other."P18 |
| “…but I think my feeling anyway for the incentivised quit is that it'd be low key and it'd be done through the staff [referrals] and open service. So, when people come in the door, they'll be told then about it obviously then word of mouth will grow as well yeah but I mean there'll be people coming into the service anyway I don't know that's my thinking anyway" P1 |
| “And I have a clinic out in [location] and if people think they're going to get in the centre in Longford town, then they're not going to go... There's a lot of very disadvantaged people in [location] that don't have medical cards. A lot, I would say. They're in rural areas and they have no transport and they might have a little bit of land or whatever but they're extremely disadvantaged. So, for me, I don't think having a medical card it's kind of criteria." P5 |
| “And how do we have a cut off or whatever, and something that isn't, that you're not making a decision as an advisor, well, you're getting it and you're not getting it. Do you know what I mean? That there's something kind of that you could say, well, this is the criteria we use and unfortunately you can't, or whatever that is." P1 |
| “I think it gets tricky if you have a [geographical] boundary and if your address is one kilometre away from the area that's identified and then you create this dynamic level, they [people form these communities are perceived to] get everything and then people from certain communities, they often feel that they're happy for everyone [including these communities] to get it." P04 |
| “But it doesn't need to be as targeted, so I think from a sensitivity point of view; it's not always ideal to have a very targeted approach, particularly when you're talking about smoking, [that's] lots of people."P11 |
| “But the other thing is marginalised communities as we've traditionally known them are all changing in terms of demographics. I mean, social housing now is a part of every new housing estate, and we just need to understand that a lot of regeneration in our city now, a lot of the suburbs around Limerick, have a lot of people who would be on the threshold of poverty and stuff like that. So, I agree with you though in terms of Healthy Communities here is that you know we're having more than the 60 to 70 percent of those from our communities attend programs but there are some from outside it and actually that normalises programs as well which is good to know that variety of people attending" P12 |
| “The problem here is if you make it from medical card only, if people are trying to access that and they're told it's only for people with medical cards, it stigmatises those who run on it. oh, they're on a Medicare up there." P12 |
| “Yeah, but that's why we're saying we’d need that's why we would need to ensure that we've got clear instructions or clear guidelines for you to be able to determine who would be in the financial clinic and who wouldn't so that at the end of the day it's not you making the decision it's powers is above you that and you just go the computer says no kind of thing or then you're back to everyone in the Slaintecare area getting the financial incentive. But we want to we want to make this as whatever is the best option for you as well as advisors offering the service" P1 |
| **5. The implementation chasm: attuning expectations** | |
| 1. Operationalisation of the scheme | “Because I suppose we face too much at hand. But we make an attempt to do it [deliver the incentive] on the day ...And then I would say kind of within a week of waiting for an appointment."P13 |
| “I think about the administration on what is already a very difficult process around the stop smoking advisor. My focus with working with somebody is to get them four weeks quit. And that's where my priority would be is I should be able to give them a reward at a week, …because you need an immediate incentive at that early stage." P11 |
| “I said what [name] said ASAP as well. Butputting my admin hat on, it'd be nice to see something like five working days or 7 working days…. I know that sounds clinical or cold, but it's, you're just thinking how, how are you going to get it into their account, get their banking money released, "P16 |
| “I was going to say is give them the reward whenever you say you're going to give it, so whatever the agreement is at the beginning If they're here saying to your client, you're going to get it at four weeks or eight weeks or 12, just give it to them immediately. When it's due rather than before. "P7 |
| “...it [communications] couldn't be done centrally at scale because you just wouldn't have the resources unless you've got a good client to do it or something like that. it still involves some message coming from an advisor or someone else to do it " P02 |
| "I mean, in this area [communications], we have, like, huge restrictions on spend, we can't spend anything, or travel, or anything like, without prior approval, and it just that we're already kind of in a bit of a deficit around kind of even communicating what services we currently have. So, then we'll be in more of a deficit in communicating this and we haven't been able to kind of, like order any posters, or anything at the time. So, I suppose we need a good budget for communication that can be able to say, in general, for this to work as well,"" P16 |
| ""We're not being negative here, in any kind, so don't please take it like that there, either, - but we're being very realistic, to be honest with you, as the saying goes, foreseen is forewarned, so to speak, in this here so I suppose that's the way, where we're going to go. ""P13" |
| Communication by the HSE, because it's seen as a trusted resource, and that could be either nationally developed, locally disseminated, or whatever, and healthcare professionals. I think I'm not sure what the answer is to how it's administered. I think whatever is the most efficient way to do it is the best. So, I don't know. Maybe the pilot will find out what that process is." P4 |
| "Yeah, I had said HSE or TFI. And I suppose where I'm coming from is the community sector. You know, so we have community facilitators. So, we wouldn't have the resources for our facilitators, or I wouldn't be giving them the responsibility either to manage that."" P9  "I think it would have to come from a centralised area. |
|  |
| “I agree. If there were national templates that we could kind of disseminate locally, that would be great. The people that should be referring are the people, in a way; local healthcare professionals and community-based organisations. I think it's a really good opportunity to use comms to promote the service in one way, to increase uptake of the service in Longford....And then, yeah, I said if national TFI could organise the incentive, that would be great as well."P7 |
| "You have to think of the restructuring component. The comms piece, there's the comms piece that comes from you guys with the appropriate branding and the appropriate key message so that you're happy with what has been shared around Longford. The incentive piece, like I was certain from a staff management perspective, I wouldn’t be happy with the team being responsible for holding on to vouchers and money and the pressures that would put on people at a local level. So, we have to think where we'd even store it - in a secure environment. So, we have to think about the admin piece. So, my thinking would be of it being centralised in our admin teams. The PR piece, I really do strongly... ""  "But in our department, we can manage something within our department. The promotional piece, certainly within our health services, and that would be tracked as well. I strongly believe our health service staff should have KPIs for referring them to our services. |
| “I said stop smoking advisors because I suppose we're not an operational service. We're meant to be strategy and planning. So, we have no way of verifying or administering a service. And for the pilot, we are considering the possibility of doing the admin part of getting the vouchers out. But I just don't, for a pilot, I'm worried about that as well. As in, can we do that? If this were to scale, and even if the centre is going to be still there, is it practical? Do you know what I mean? So, I'm a little bit worried about that. So, stop smoking advisors, in a sense. And it's not to avoid this at work.” P3 |
| “Administer the incentive I don't know. It depends on what the incentive is. if it's vouchers or cash. Like, I wouldn't be on for cash or... I don't know, to be honest, I think we'd need help with it! Like the worst-case scenario would be, like, to have a group of people waiting for their voucher or waiting for their money and smoking advice about sick or something like that." P9 |
| “I think that the administration or the providing or the organising of the incentive should be done by somebody apart from outside of the stop smoking advisor, probably TFI."P8 |
| " I think if that was built into the contract of it, if you relapse during this period of time that the no-said, for example, then you will not be credited with any vouchers. You don’t have the capacity to do that in TFI, but this is where the smoking cessation advisors could have the capacity to do it, because if we were sitting with a sheet, and Joe Blogs is coming in, and here we are, and we were giving them, we're crediting their system and crediting them, and then at the end of whatever period, and as [name] said, that might be, say, now it's subject to you, again, being able to withdraw your cash available to you at whatever periods but it must be sensible periods like, say, for example, so I think that'd be easy, and put an awful lot of less on yourself, so not there, to be honest with you."" P13  "And there'd need to be a commitment as well, that even if the pilot program kind of ended, before, which I'm sure it won't, anyhow, before the year, that anybody who has started, and is engaged in the process, would still get their money. Even if it was decided in the meantime, that it wasn't going to continue, or it wasn't going to be offered anymore." P 16 |
| 1. Public perception and (un)managing consequences | “I think we care; I know we have to sell this to the public because it may be under scrutiny and stuff like that but I would just tread carefully in terms of always being pigeonholed into that direction because of the consequences" P12 |
| “Just the unintended consequence of that is that you might have people who won't attend We Can Quit because they'll want to, and we already find it very, very difficult to fill We Can Quit as it is, but word will get around and this will get media coverage." P12 |
| “If they're going to be very set criteria for who can and who can't take part in this program then maybe we shouldn't do any kind of you know over public advertising. Let the world do its thing; there will be some media pick up when it's heard about, to be on radio, but maybe we don't advertise at primary care centres and do the poster pieces that I kind of had in my head maybe we just let it do its own thing." P11 |
| “Our perspective it's like that's kind of reasonable budget wise. It matches what they do in the UK roughly (around 400-500 euros) and I think it's sellable to the public in that it's enough to get by" P13 |
| “So, it's probably a bit about being able to defend it in public as well... More acceptable to the general public as well, 400 or 450 euros might be ok" P19 |
| “Second I just did the least preference is just for attendance only that we were given a voucher for attendance only I think it would be hard to defend that kind of position in a public space" P13 |
| “Yes, but in two years’ time we may be able to offer this in all 20 Slaintecare areas, and Slaintecare might be bigger by then. and if we can offer it everywhere absolutely, we will advertise it more widely. But because this is a pilot, we need to kind of go slow for the initial period. Get it right first and be able to stand over it and say exactly the right type of people are coming to the service. It’s been successful and we are not having any issues with it and kind of slowly grow it over time, is the hope." P19 |
| “That's the way they did it in the UK. so they have this scheme in the UK but only for pregnancy and so they've been doing it for 10 years and they did it slowly, they didn't really advertise but this last year they put in money through kind of a maternity strategy to the department to basically roll this out for every pregnant woman across all services in the UK and they're kind of advertising it now but they've you know I suppose the public have accepted there isn't that backlash but you will have people you know what I mean so you just it is; you’re at risk of people saying what do you mean you are paying people. Like very sad cases of people who can’t get their child to have a scoliosis operation or whatever it is they’ll be saying oh well you're paying a smoker and sure they did that to themselves so it's just kind of arguing all." P13 |
| “There is a possibility that we run this study and find after a year that actually it doesn’t increase quit rates at all because the guys are doing such a great job that adding an extra 200, 300 to it doesn't matter. In which case, you'd say, well, why are they spending all the money on it then?" P11 |
| “For me personally, of course the money's a part. I would tend to be with suspicious of somebody who kind of says it's [money] not a part of it, I kind of go, really? Of course, it's important and I think maybe we underestimate how important it is you probably need to get the amount right as well to make it why someone sticks with it, but not so much that it becomes something that's very difficult to stand over publicly and defend, so we're trying to kind of walk a bit of a tightrope and kind of meet in the middle ground somewhere."P19 |
| “That's the point so happy days and we see how it goes and if it's a successful then there shouldn't be any complaints about it or any hold back on any money that needs to be if it needs to be funded but more than I totally understand that. It's £450 million a year. Is that what you were saying to me?" P2  " £460 million? What does it cost the health service?" P1  " That what it costs the health service to treat people with smoking related conditions." P13  " So that is a savage amount of money" P2  " So those are the arguments we use to the department when we're trying to get money in and say, well look, you gave us even a 1% of that, it could save you 20%." P13 |
| "We definitely have to go ahead and figure out a criterion, because if not that would just cause uproar" P7 |
| “But I'm a wee bit apprehensive about it [promoting the incentive] as well, because it's paying people to quit smoking, and how that looks from the external perspective. And then, yeah, I said if national TFI could organise the incentive, that would be great as well."P7 |

**Additional file 6:** Co-design FI scheme pilot materials


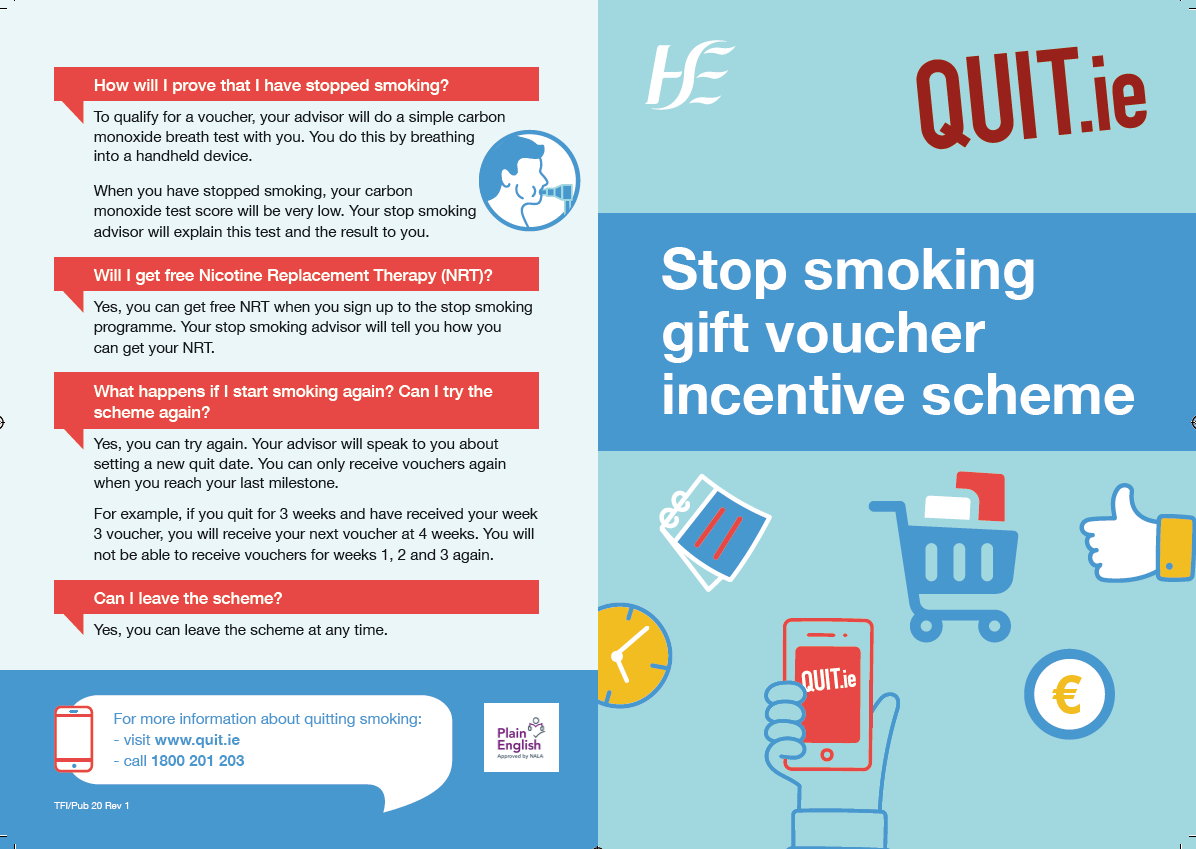


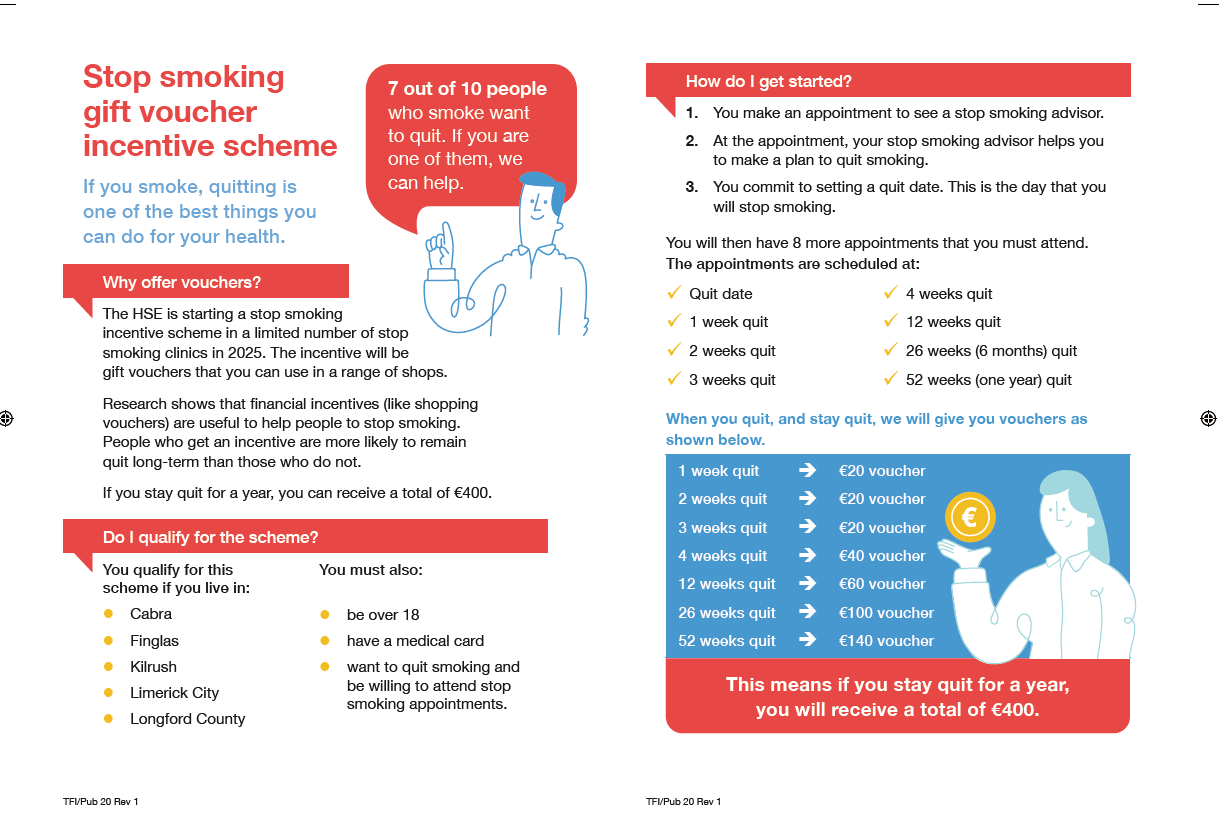

Supplement: Supplementary file 1 [file f71d3c9bee328378b3d6c04f.docx]
